# Supplementary material for: Nanohydroxyapatite/cellulose nanocrystals/silk fibroin ternary scaffolds for rat calvarial defect regeneration
Source: Royal Society of Chemistry journal article supplement (doi:10.1039/c6ra02038k), 2016-01-01
Supplement: c6ra02038k1.pdf [file c6ra02038k1.pdf]

**Nanohydroxyapatite/cellulose nanocrystals/silk fibroin ternary scaffolds for rat calvarial  
defect regeneration**

Xiaoming Chen <sup>a, b</sup>, Runmei Zhou <sup>c</sup>, Bin Chen <sup>d</sup>, Jianting Chen <sup>a\*</sup>

<sup>a</sup> Department of Orthopedic Spinal Surgery, Nanfang Hospital, Southern Medical University,  
Guangzhou 510515, China

<sup>b</sup> Department of Orthopedic Spinal Surgery, the 2th Affiliated Hospital, University of South China,  
Hengyang 421001, China

<sup>c</sup> Department of Pharmacy, the 2th Affiliated Hospital, University of South China, Hengyang  
421001, China

<sup>d</sup> Department of Orthopedic Spinal Surgery, Chenzhou No.1 People's Hospital, Chenzhou 423000,  
China

\* Corresponding author

Email: chenjt99@tom.com

Tel/Fax: +86-20-87640940

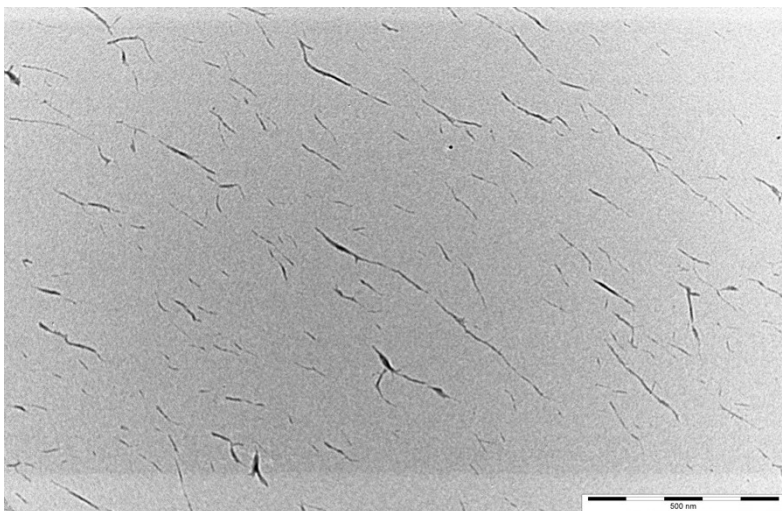

**Fig.S1** TEM micrographs of CNC.

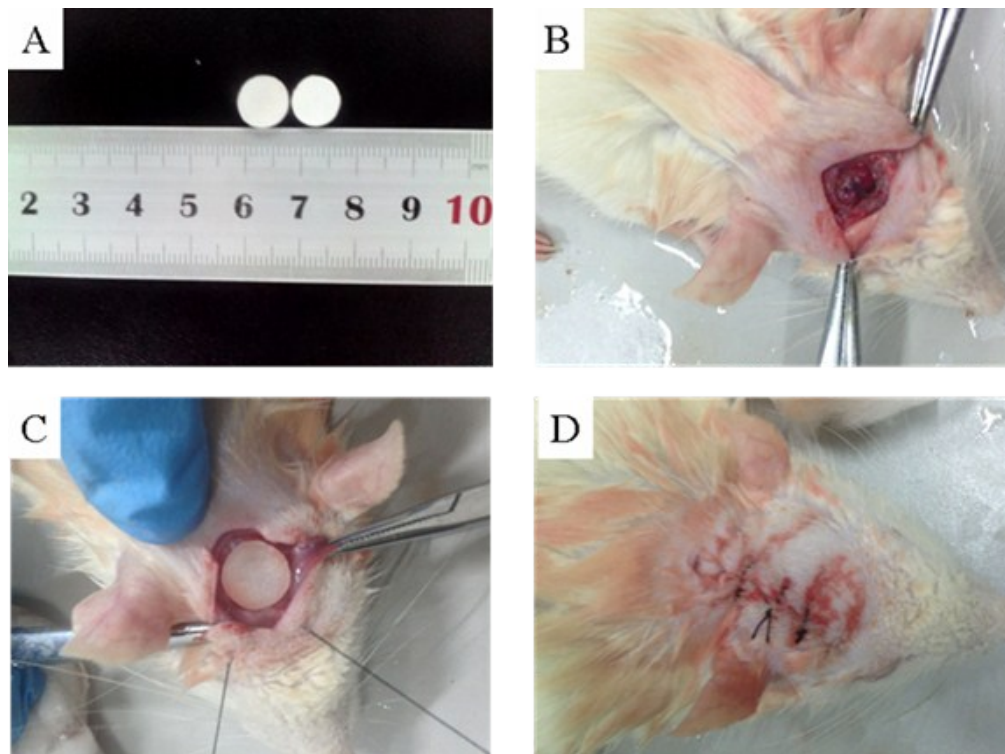

**Fig.S2** Surgical process of composite scaffold transplantation into rat calvarial defects.

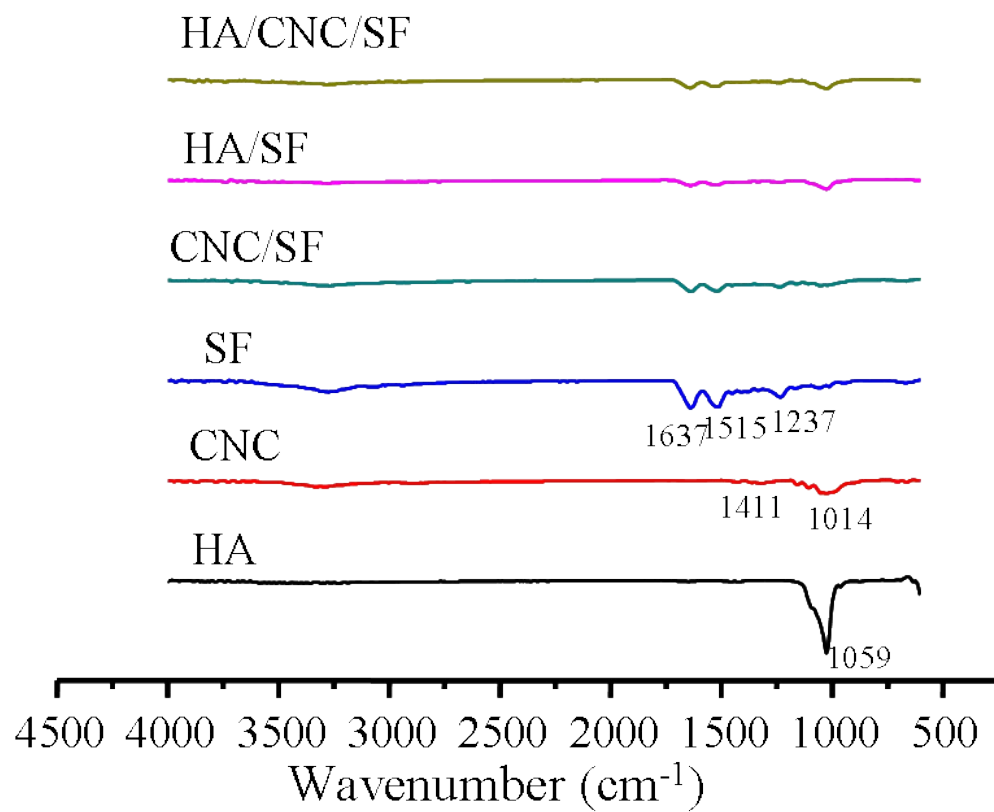

**Fig.S3** FTIR spectra of HA, cellulose nanocrystals (CNC), silk fibroin (SF) and SF-based composite scaffolds.
